# Supplementary material
Source: publisher figshare collection journal article supplement (https://tandf.figshare.com/ndownloader/files/13085723)
Supplement: Supplementary file 1 [file 13085723]

**Table S1** Summary of densities of stems of multi-stem individuals (SMI) and stems of single-stem individuals (SSI) in the overstory, the understory, and the entire study stand (no./ha)

|  |  |  | Overstory |  |  | |  | Understory |  |  | Whole stand | | |
| --- | --- | --- | --- | --- | --- | --- | --- | --- | --- | --- | --- | --- | --- |
|  |  | 1985 | 1990 | 2014 |  | | 1985 | 1990 | 2014 |  | 1985 | 1990 | 2014 |
| Density of SMI |  |  |  |  |  |  | |  |  |  |  |  |  |
| Total |  | 33 | 33 | 250 |  | | 117 | 100 | 2967 |  | 150 | 133 | 3217 |
| Evergreen tree |  | 33 | 33 | 250 |  | | 75 | 75 | 1617 |  | 108 | 108 | 1867 |
| Evergreen shrub |  | 0 | 0 | 0 |  | | 25 | 25 | 1241 |  | 25 | 25 | 1242 |
| Deciduous tree |  | 0 | 0 | 0 |  | | 17 | 0 | 17 |  | 17 | 0 | 17 |
| Deciduous shrub |  | 0 | 0 | 0 |  | | 0 | 0 | 92 |  | 0 | 0 | 92 |
|  |  |  |  |  |  | |  |  |  |  |  |  |  |
| Density of SSI |  |  |  |  |  | |  |  |  |  |  |  |  |
| Total |  | 492 | 533 | 142 |  | | 4333 | 3775 | 3183 |  | 4825 | 4308 | 3325 |
| Evergreen tree |  | 425 | 433 | 117 |  | | 2600 | 2208 | 1233 |  | 3025 | 2642 | 1350 |
| Evergreen shrub |  | 8 | 0 | 0 |  | | 1442 | 1392 | 1850 |  | 1450 | 1392 | 1850 |
| Deciduous tree |  | 58 | 100 | 25 |  | | 100 | 33 | 33 |  | 158 | 133 | 58 |
| Deciduous shrub |  | 0 | 0 | 0 |  | | 192 | 142 | 67 |  | 192 | 142 | 67 |

SMI and SSI denote stems consisting of multi-stem individuals, and stems of single-stem individuals, respectively.

Table S2 Number of stems of species in the study stand

| Species | Overstory | | |  | Understory | | |
| --- | --- | --- | --- | --- | --- | --- | --- |
|  | 1985 | 1990 | 2014 |  | 1985 | 1990 | 2014 |
| Evergreen tree |  |  |  |  |  |  |  |
| *Castanopsis sieboldii* | 49 | 49 | 39 |  | 100 | 84 | 169 |
| *Cinnamomum camphora* | 0 | 0 | 0 |  | 2 | 1 | 0 |
| *Cinnamomum japonicum* | 0 | 0 | 2 |  | 18 | 18 | 17 |
| *Cleyera japonica* | 0 | 0 | 0 |  | 1 | 1 | 5 |
| *Daphniphyllum macropodum* | 0 | 0 | 0 |  | 6 | 5 | 0 |
| *Daphniphyllum teijsmannii* | 0 | 1 | 1 |  | 49 | 41 | 17 |
| *Dendropanax trifidus* | 0 | 0 | 0 |  | 1 | 1 | 1 |
| *Elaeocarpus japonicus* | 0 | 0 | 0 |  | 5 | 4 | 11 |
| *Ilex buergeri* | 0 | 0 | 0 |  | 3 | 3 | 1 |
| *Ilex chinensis* | 0 | 0 | 0 |  | 1 | 0 | 1 |
| *Ilex integra* | 0 | 0 | 0 |  | 9 | 10 | 11 |
| *Ilex rotunda* | 0 | 0 | 0 |  | 3 | 2 | 1 |
| *Lithocarpus edulis* | 3 | 2 | 0 |  | 60 | 47 | 29 |
| *Litsea acuminate* | 0 | 0 | 0 |  | 0 | 0 | 2 |
| *Litsea coreana* | 0 | 0 | 0 |  | 1 | 1 | 1 |
| *Machilus japonica* | 0 | 0 | 0 |  | 1 | 1 | 0 |
| *Machilus thunbergii* | 1 | 2 | 1 |  | 25 | 20 | 22 |
| *Neolitsea aciculate* | 0 | 0 | 0 |  | 1 | 1 | 7 |
| *Neolitsea sericea* | 0 | 0 | 0 |  | 7 | 7 | 13 |
| *Podocarpus macropyllus* | 0 | 0 | 0 |  | 1 | 1 | 2 |
| *Prunus spinulosa* | 0 | 0 | 0 |  | 3 | 3 | 1 |
| *Quercus hondae* | 2 | 2 | 1 |  | 0 | 0 | 1 |
| *Quercus myrsinaefolia* | 0 | 0 | 0 |  | 1 | 0 | 0 |
| *Quercus salicina* | 0 | 0 | 0 |  | 0 | 0 | 1 |
| *Symplocos Kuroki* | 0 | 0 | 0 |  | 13 | 13 | 12 |
| *Ternstroemia gymnanthera* | 0 | 0 | 0 |  | 10 | 10 | 15 |
| Evergreen shrub |  |  |  |  |  |  |  |
| *Ardisia crenata* | 0 | 0 | 0 |  | 0 | 0 | 1 |
| *Aucuba japonica* | 0 | 0 | 0 |  | 67 | 66 | 249 |
| *Eurya japonica* | 1 | 0 | 0 |  | 91 | 87 | 96 |
| *Fatsia japonica* | 0 | 0 | 0 |  | 1 | 1 | 0 |
| *Ligustrum japonicum* | 0 | 0 | 0 |  | 16 | 15 | 19 |
| *Maclura cochichinensis var. gerontogea* | 0 | 0 | 0 |  | 1 | 1 | 0 |
| *Rapanaea neriifolia* | 0 | 0 | 0 |  | 0 | 0 | 4 |
| Deciduous tree |  |  |  |  |  |  |  |
| *Acer mono* | 1 | 2 | 1 |  | 2 | 1 | 2 |
| *Acer palmatum* | 0 | 1 | 0 |  | 1 | 0 | 0 |
| *Carpinus tschonoskii* | 1 | 1 | 1 |  | 2 | 2 | 0 |
| *Euscaphis japonica* | 0 | 0 | 0 |  | 0 | 0 | 1 |
| *Prunus jamasakura* | 0 | 0 | 0 |  | 2 | 0 | 0 |
| *Quercus acutissima* | 0 | 0 | 0 |  | 1 | 0 | 0 |
| *Quercus serrata* | 5 | 8 | 1 |  | 5 | 0 | 0 |
| *Styrax japonica* | 0 | 0 | 0 |  | 1 | 1 | 3 |
| Deciduous shrub |  |  |  |  |  |  |  |
| *Callicarpa japonica* | 0 | 0 | 0 |  | 2 | 2 | 0 |
| *Callicarpa mollis* | 0 | 0 | 0 |  | 0 | 0 | 4 |
| *Euonymus alatus* | 0 | 0 | 0 |  | 0 | 0 | 1 |
| *Ficus erecta* | 0 | 0 | 0 |  | 11 | 11 | 13 |
| *Helwingia japonica* | 0 | 0 | 0 |  | 1 | 1 | 1 |
| *Pourthiaea villosa var. laevis* | 0 | 0 | 0 |  | 6 | 1 | 0 |
| *Viburnum dilatatum* | 0 | 0 | 0 |  | 1 | 1 | 0 |
| *Viburnum erosum var. punctatum* | 0 | 0 | 0 |  | 2 | 1 | 0 |
